# Supplementary material for: Low-cost, real-time detection of bacterial growth via diffraction-based sensing
Source: Royal Society of Chemistry journal article supplement (doi:10.1039/d4ay01489h), 2024-01-01
Supplement: d4ay01489h1.pdf [file d4ay01489h1.pdf]

Supporting Information

**Low-Cost, Real-Time Detection of Bacterial Growth via Diffraction-Based Sensing**

Nicholas K. Kotoulas, Tomoyuki Sen, and M. Cynthia Goh\*

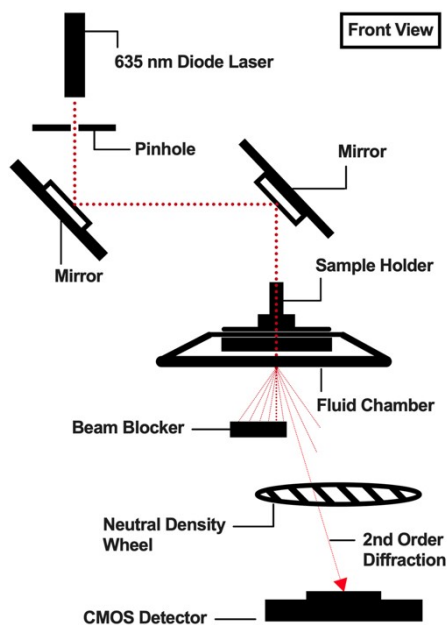

**Figure S1:** A schematic of our optical setup used to measure changes in diffraction spot intensity ( $m=2$ ).

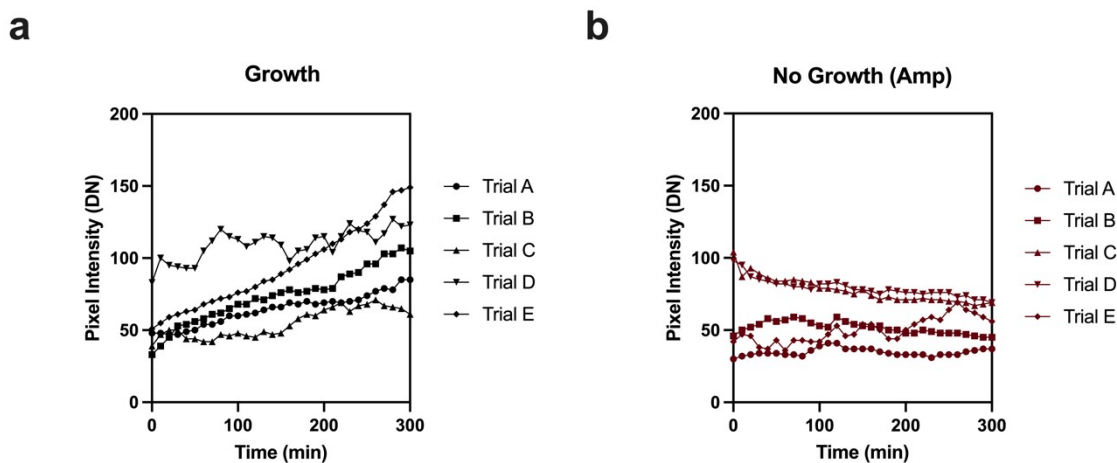

**Figure S2:** All replicate changes in diffraction signal intensity (raw data) of *Escherichia coli* DH5 $\alpha$  in growth (a) and no growth (ampicillin) (b) conditions.
